# Supplementary material for: Multiplex staining depicts the immune infiltrate in colitis-induced colon cancer model
Source: PubMed Central journal article supplement (PMC6718623; doi:10.1038/s41598-019-49164-3), 2019-09-02
Supplement: 41598_2019_49164_MOESM1_ESM.pdf [file 41598_2019_49164_MOESM1_ESM.pdf]

## **Supplemental material**

### **“Multiplex staining depicts the immune infiltrate in colitis-induced colon cancer model”**

Eliana Pivetta, Alessandra Capuano, Eugenio Scanziani, Lucia Minoli, Eva Andreuzzi, Maurizio Mongiat, Gustavo Baldassarre, Roberto Doliana, Paola Spessotto

## Supplementary Material and Methods

### Flow Cytometry Analysis

For Flow Cytometry analysis the antibodies used are reported in the following table.

**Table S1. Primary antibodies used in flow cytometry analysis.**

| Primary Antibodies | Fluorophore     | RRID       | Brand          | Host    |
|--------------------|-----------------|------------|----------------|---------|
| CD11b              | PerCP-Cy5.5     | AB_953560  | eBiosciences   | rat     |
| CD4                | Alexa Fluor 700 | AB_494001  | Ebiosciences   | rat     |
| Ly-6G              | FITC            | AB_465313  | Ebiosciences   | rat     |
| CD45               | Pe-Cy5          | AB_468751  | Ebiosciences   | rat     |
| CD8                | PE              | AB_657769  | Ebiosciences   | rat     |
| CD19               | FITC            | AB_657666  | Ebiosciences   | rat     |
| F4/80              | BV421           | AB_2734779 | BD Biosciences | rat     |
| Ly-6C              | Alexa Fluor 700 | NA         | BD Biosciences | rat     |
| CD11c              | PE              | AB_2033996 | BD Biosciences | hamster |
| MHC II             | BV650           | NA         | BD Biosciences | rat     |
| CD3                | BV510           | NA         | BD Biosciences | hamster |

NA = not applicable (in the data base the corresponding antibodies were not found)

## Immunohistochemistry

For immunohistochemistry analysis the antibodies used are reported in the following table.

**Table S2. Antibodies used in IHC analysis**

| Primary antibodies          | Company                     | RRID       | Dilutions                  | Host             | Detection method |
|-----------------------------|-----------------------------|------------|----------------------------|------------------|------------------|
| CD3e                        | Abcam                       | AB_305055  | 1:1,000                    | rabbit           | TSA              |
| CD3e                        | Santa Cruz                  | AB_631128  | 1:2,000                    | goat             | DAB              |
| CD4                         | Abcam                       |            | 1:1,000<br>1:4,000         | rabbit           | DAB<br>TSA       |
| CD8a                        | Synaptic System             | AB_2800529 | 1:500<br>1:1,000           | rabbit           | DAB<br>TSA       |
| CD45R/B220                  | BD Pharmigen                | AB_2737894 | 1:500(DAB)<br>1:1,000(TSA) | rat              | DAB<br>TSA       |
| MPO                         | Dako                        | AB_2335676 | 1:2,000                    | rabbit           | DAB              |
| <b>Secondary antibodies</b> |                             |            |                            |                  |                  |
| Anti-rabbit                 | Vector                      |            | 1:3                        | goat             | TSA              |
| Anti-rat                    | Thermo Fisher Sc.<br>Vector |            | 1:500<br>1:200             | donkey<br>rabbit | DAB<br>TSA       |
| Anti-goat                   | Vector                      |            | 1:200                      | rabbit           | DAB              |

## Histopathology evaluation

Histopathology evaluation was made in a blind fashion, i.e. without knowledge of the treatment group.

The following findings have been detected and scored.

Epithelial damage: loss of the epithelial layer of the enteric mucosa. This finding was scored as follow:

0 = absence of epithelial damage; 1 = low epithelial damage; 2= moderate epithelial damage; 3 =

severe epithelial damage. (In some cases squamous metaplasia of the epithelial layer was observed.

This finding was scored as epithelial damage with the indication of metaplasia.)

Lamina propria (LP) infiltrate: presence of infiltrating inflammatory cells within lamina propria. This finding was scored as follow: 0 = absence of infiltrating cells; 1= poor presence of infiltrating cells; 2 = moderate presence of infiltrating cells; 3 = severe presence of infiltrating cells

### **Immunohistochemistry evaluation**

Immunohistochemical evaluation was made in a blind fashion, i.e. without knowledge of the treatment group. Immunostaining for inflammatory cells (CD45R/B220, CD3 epsilon, MPO) was scored counting the number of positive cells within the mucosa (excluded cells of lymphoid follicles) as follows: 0 = 0; 1 = 1 to 5 cells; 2 = 6 to 25 cells; 3 = 25 to 125 cells; 4 = > 125 cells.

## Supplementary Figures

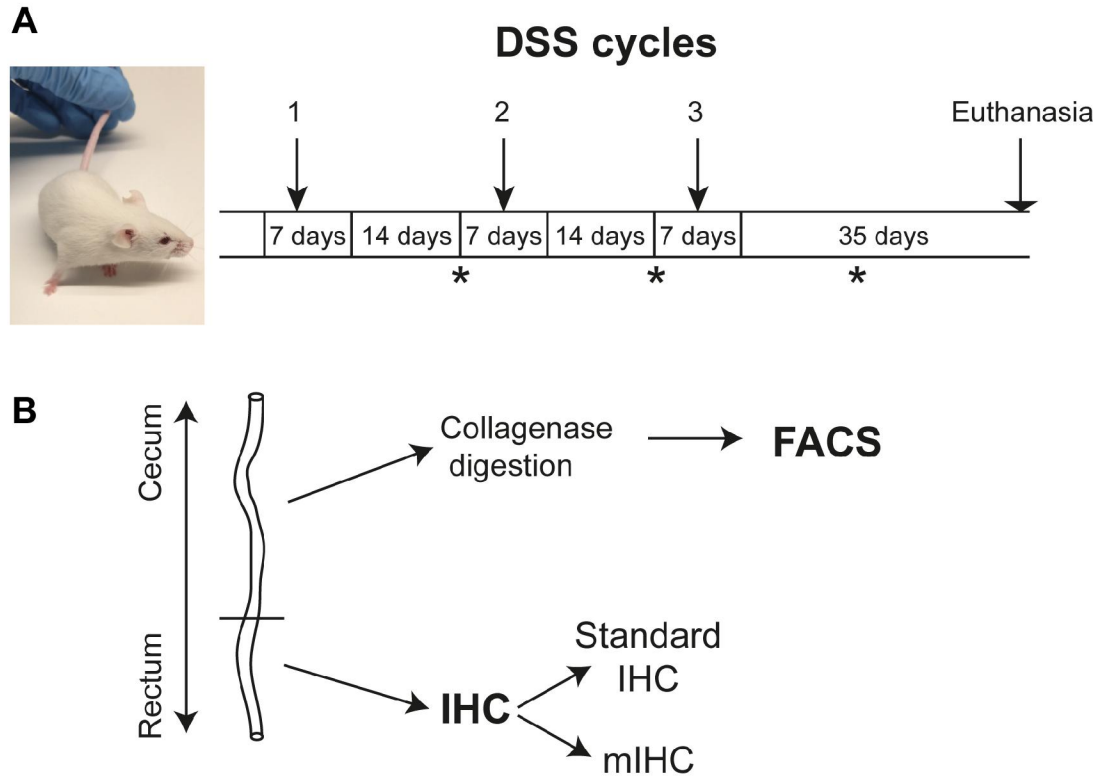

**Supplementary Figure S1. Experimental design.** A) Schematic representation of DSS treatment to induce chronic colitis. Mice were treated with 3% DSS in drinking water for seven days, then an interval of fourteen days took place. The treatment was repeated for three times. Every 21 days from the beginning, colon endoscopic evaluation was performed (\*). B) After euthanasia colons were washed and cut in two portion, one subjected to collagenase digestion for cell isolation and flow cytometry analysis, and one fixed and paraffin embedded for immunohistochemistry analysis.

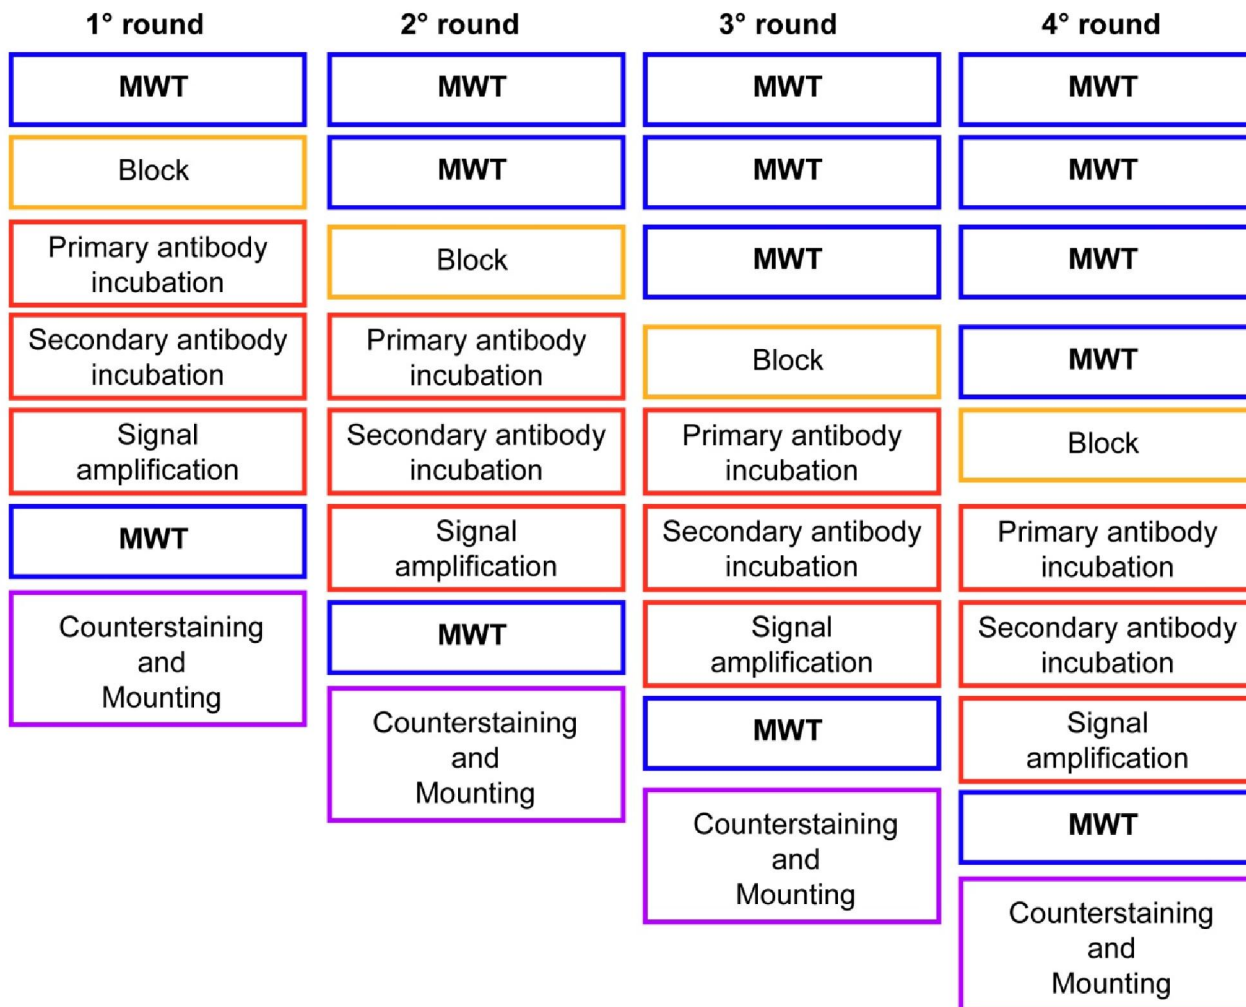

**Supplementary Figure S2. Schematic representation to identify antibody sequence incubation.**

Graphical description of the protocol to test the effect of microwave treatment (MWT) on antigen stability, applied to each antibody used. In classical immunohistochemistry, primary antibody was applied after one round of MWT (1° column). We tested the efficiency of antibody recognition after two, three of four rounds of MWT (respectively 2°, 3° and 4° column).

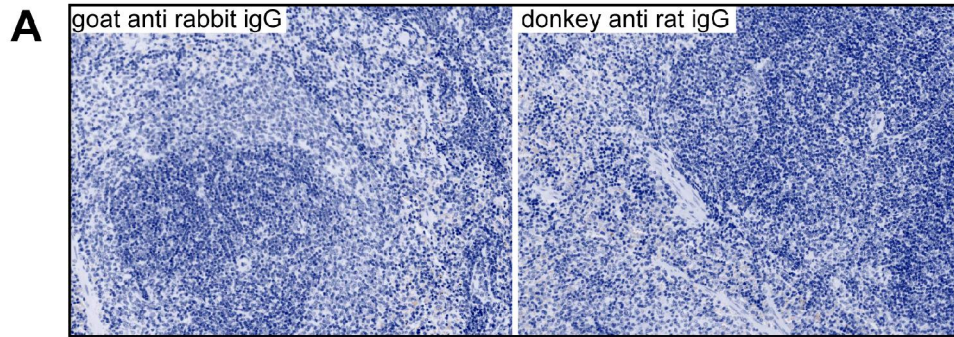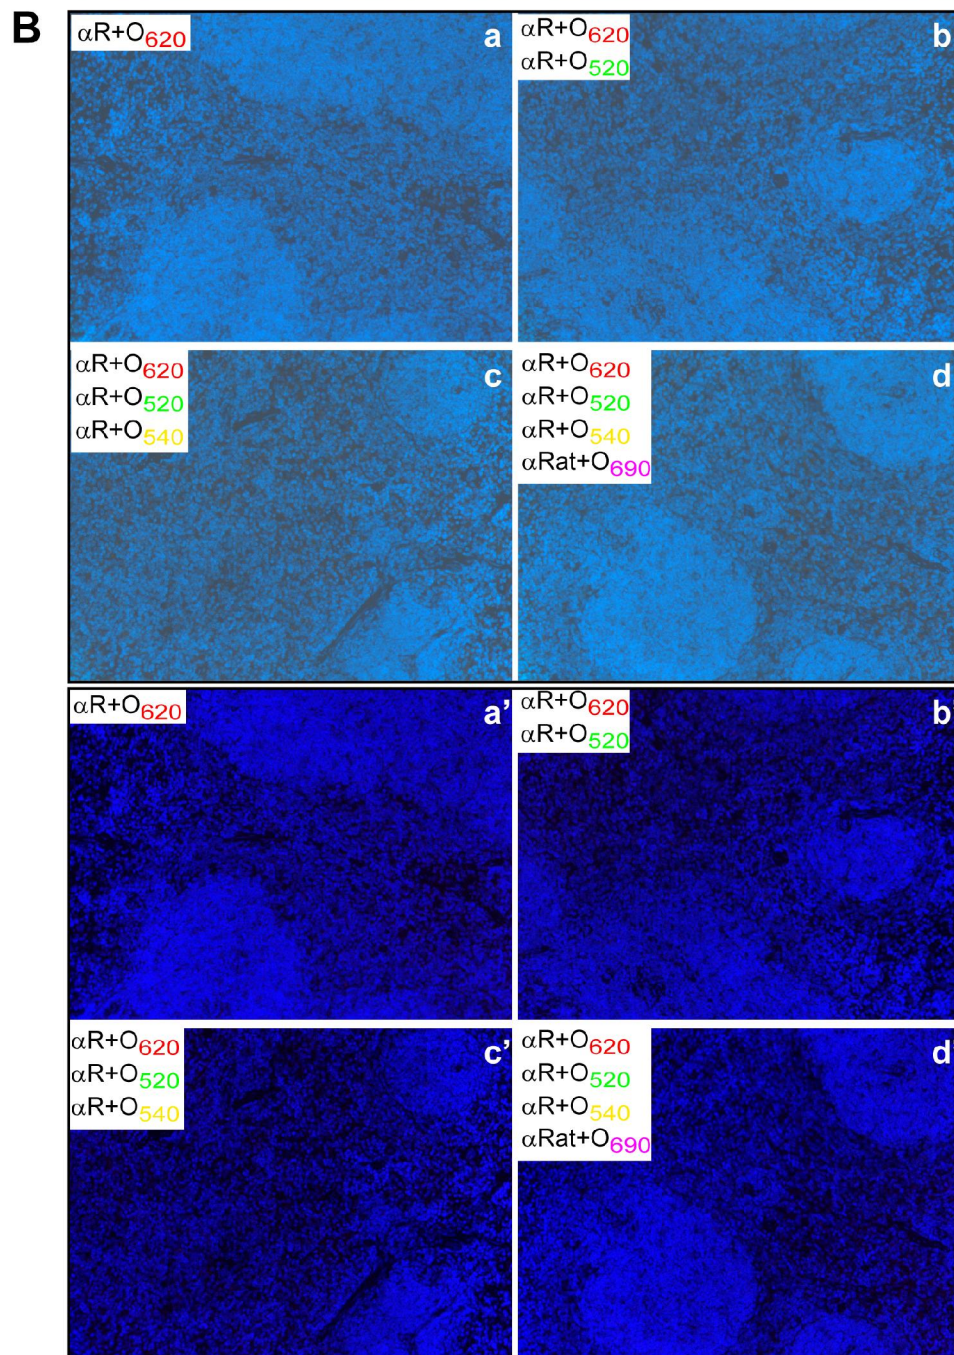

**Supplementary Figure S3. Negative controls.** A) Representative images of FFPE spleen mouse sections processed omitting primary antibodies. The sections were stained using anti rabbit (left) or anti rat (right) HRP-conjugated secondary antibodies followed by DAB detection. B) Representative images of FFPE spleen mouse sections without incubation with primary antibodies and processed using HRP-conjugated secondary antibodies as follows: in a and a', anti rabbit and OPAL620 (mimicked single staining); in b and b', anti rabbit and OPAL620, followed by staining with anti rabbit and OPAL520 (mimicked double staining); in c and c', anti rabbit and OPAL620, followed by staining with anti rabbit and OPAL520 and then by anti rabbit and OPAL540 (mimicked triple staining); in d and d', anti rabbit and OPAL620, followed by staining with anti rabbit and OPAL520, then by anti rabbit and OPAL540 and finally by anti rat and OPAL690 (mimicked quadruple staining). Images a, b, c, and d are obtained from original acquisition; a', b', c', and d' are derived from autofluorescence subtraction process. 200x, original magnification.
